# Supplementary material for: Indirect to direct band gap transition in ultra-thin silicon films
Source: Royal Society of Chemistry journal article supplement (doi:10.1039/c3cp50429h), 2013-01-01
Supplement: c3cp50429h.pdf [file c3cp50429h.pdf]

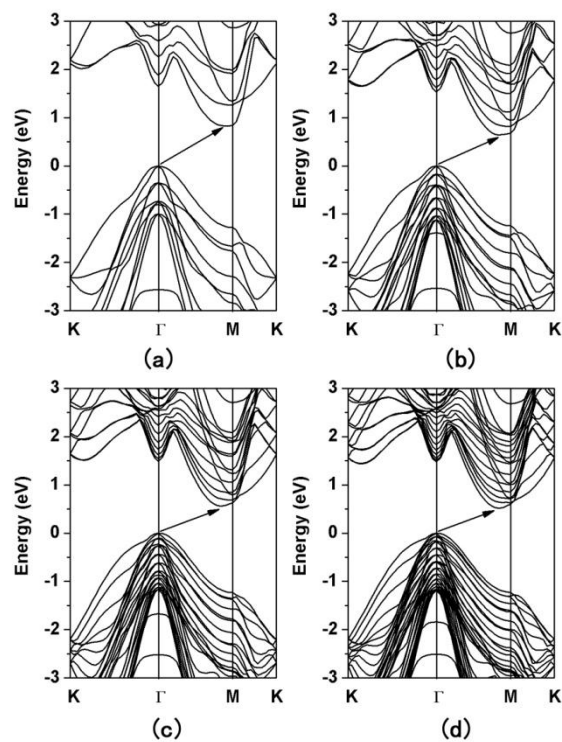

Figure 1s. The band gap structure of Si (111) Layers terminated with only SiH groups on the surface.

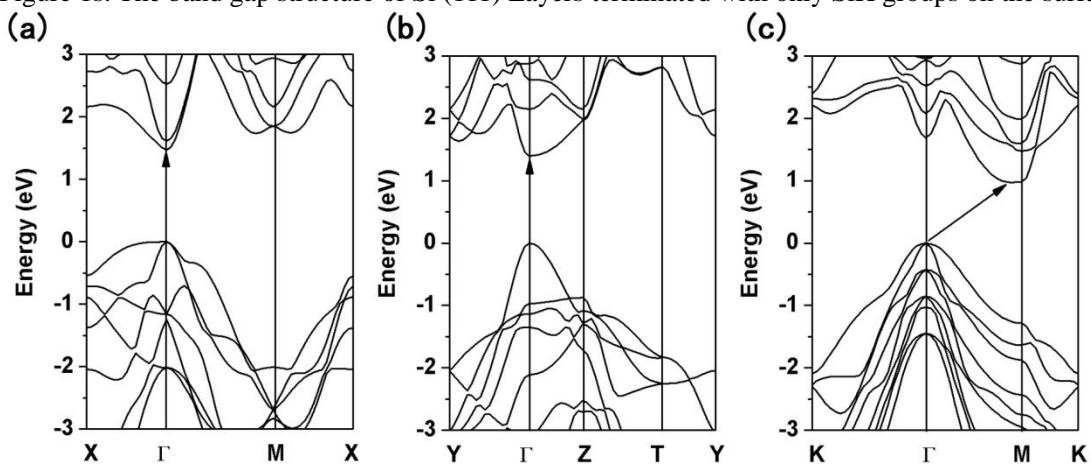

Fig.2s Band gap structure of (a) (100) monolayer, (b) (110) monolayer, (c) (111) monolayer without structural optimization
